# Supplementary material
Source: ML conference proceedings conference paper supplement (https://openaccess.thecvf.com/content/cvpr_2015/html/Tan_Learning_Graph_Structure_2015_CVPR_paper.html)
Supplement: Supplementary file 1 [file Tan_Learning_Graph_Structure_2015_CVPR_supplemental.pdf]

## Supplementary Materials for Paper 1915

Due to the page limit, in the main paper, we omitted some details of Algorithms 1 and 2, and all the proof of the main conclusions. In this supplementary file, we first present the omitted details of Algorithms 1 and 2, and then present the derivations of the main conclusions in the paper.

### A. More Details about Algorithm 1 and Algorithm 2

For convenience, we first present the stopping conditions of Algorithm 2.

#### A.1. Stopping Condition of Algorithm 2

It is usually non-trivial to set a proper stopping condition for stochastic optimization algorithms. Usually, we can stop an algorithm when the objective value does not change significantly. For example, we can stop Algorithm 2 if the primal objective value cannot decrease significantly. Unfortunately, computing the primal objective value  $f_h$  is very expensive. Moreover, **the primal objective value does not monotonically decrease w.r.t.  $h$** . Therefore, we propose to stop Algorithm 2 if  $h > 5$  and

$$\frac{|f_h - f_{h-5}|}{f_{h-5}} \leq \epsilon.$$

Here,  $f_h$  is computed as in Algorithm 2, and it approximates the primal objective value of the SSVM subproblem. In our implementation, we choose and fix  $\epsilon = 0.005$ .

#### A.2. Inequality Constraint Handling in Subproblem Optimization

Note that the conjugate dual of the subproblem in (12) is

$$\begin{aligned} \max_{\boldsymbol{\alpha}} \quad & -\lambda\Omega^* \left( \frac{1}{\lambda n} \sum_{i=1}^n \sum_{\mathbf{y} \neq \mathbf{y}_i} \alpha_{i\mathbf{y}} \mathbf{w}^\top \Phi_{\mathbf{y}_i, \mathbf{y}}^{\mathcal{U}^t}(\mathbf{x}_i) \right) - \frac{1}{n} \sum_{i=1}^n L_i^*(-\boldsymbol{\alpha}_{i\mathbf{y}}), \\ \text{s.t.} \quad & \sum_{\mathbf{y} \neq \mathbf{y}_i} \alpha_{i\mathbf{y}} \leq 1, \forall i \in [n]. \end{aligned} \quad (15)$$

where  $\boldsymbol{\alpha}_{i\mathbf{y}} = [\alpha_{i\mathbf{y}}]_{\mathbf{y} \neq \mathbf{y}_i}$  and  $L_i^*$  denotes the conjugate of the loss function  $L_i$ . Note that in (15), we have an **inequality constraint**  $\sum_{\mathbf{y} \neq \mathbf{y}_i} \alpha_{i\mathbf{y}} \leq 1$  on  $\boldsymbol{\alpha}_{i\mathbf{y}}$ .

In Algorithm 2, we do not store  $\alpha_{i\mathbf{y}}$  explicitly, thus we can not handle the inequality constraint directly. When the inequality constraint is ignored, the update rule  $\delta_{i\mathbf{y}} = \frac{\lambda n(\Delta(\mathbf{y}, \mathbf{y}_i) - d)}{(a^2 + \nu)}$  may be too aggressive (e.g.  $\delta_{i\mathbf{y}}$  may be too large). To address this, we use a scaled update rule  $\delta_{i\mathbf{y}} = \frac{\lambda n(\Delta(\mathbf{y}, \mathbf{y}_i) - d)}{\theta(a^2 + \nu)}$  instead, where  $\theta > 1$ . In our implementation, we initialize  $\theta = 2$  and update  $\theta := 2\theta$  when  $f_h$  does not decrease (See Algorithm 2).

#### A.3. Stopping Condition of Algorithm 1

Similar in Algorithm 2, we stop Algorithm 1 when the primal objective value does not decrease significantly. Let  $f^t = f_h$ , where  $f_h$  is the approximated primal objective value obtained from Algorithm 2. Then, we stop Algorithm 1 if  $t > 2$  and

$$\frac{|f^t - f^{t-2}|}{f_{t-2}} \leq \epsilon_o.$$

In our implementation, we choose and fix  $\epsilon_o = 0.05$ .

## B. Lagrangian Dual in (4) of Problem (3)

*Proof.* Note that  $\Phi_{\mathbf{y}_i, \mathbf{y}}^{\mathcal{V}}(\mathbf{x}_i) := \Psi_{\mathcal{V}}(\mathbf{y}_i, \mathbf{x}_i) - \Psi_{\mathcal{V}}(\mathbf{y}, \mathbf{x}_i)$ ,  $\Phi_{\mathbf{y}_i, \mathbf{y}}^{\mathcal{C}}(\mathbf{x}_i; \boldsymbol{\eta}) := \Psi_{\mathcal{C}}(\mathbf{y}_i, \mathbf{x}_i; \boldsymbol{\eta}) - \Psi_{\mathcal{C}}(\mathbf{y}, \mathbf{x}_i; \boldsymbol{\eta})$ . The Lagrangian function of the inner minimization problem in (3) can be written as:

$$\mathcal{L}(\mathbf{w}, \boldsymbol{\xi}, \boldsymbol{\alpha}, \boldsymbol{\beta}) = \frac{\lambda}{2} \|\mathbf{w}\|^2 + \frac{1}{n} \sum_{i=1}^n \xi_i - \boldsymbol{\beta}^\top \boldsymbol{\xi} + \sum_{i=1}^n \sum_{\mathbf{y} \neq \mathbf{y}_i} \alpha_{i\mathbf{y}} (\Delta(\mathbf{y}, \mathbf{y}_i) - \mathbf{u}^\top \Phi_{\mathbf{y}_i, \mathbf{y}}^{\mathcal{V}}(\mathbf{x}_i) - \mathbf{v}^\top \Phi_{\mathbf{y}_i, \mathbf{y}}^{\mathcal{C}}(\mathbf{x}_i; \boldsymbol{\eta}) - \xi_i). \quad (16)$$

Let  $\boldsymbol{\alpha} := [\alpha_{1\mathbf{y}}, \dots, \alpha_{n\mathbf{y}}]^\top$ . The KKT condition of (16) can be written as

$$\frac{\partial \mathcal{L}(\mathbf{w}, \boldsymbol{\xi}, \boldsymbol{\alpha}, \boldsymbol{\beta})}{\partial \mathbf{u}} = 0 \Rightarrow \mathbf{u} = \frac{1}{\lambda} \sum_{i=1}^n \sum_{\mathbf{y} \neq \mathbf{y}_i} \alpha_{i\mathbf{y}} \Phi_{\mathbf{y}_i, \mathbf{y}}^{\mathcal{V}}(\mathbf{x}_i); \quad (17)$$

$$\frac{\partial \mathcal{L}(\mathbf{w}, \boldsymbol{\xi}, \boldsymbol{\alpha}, \boldsymbol{\beta})}{\partial \mathbf{v}} = 0 \Rightarrow \mathbf{v} = \frac{1}{\lambda} \sum_{i=1}^n \sum_{\mathbf{y} \neq \mathbf{y}_i} \alpha_{i\mathbf{y}} \Phi_{\mathbf{y}_i, \mathbf{y}}^{\mathcal{C}}(\mathbf{x}_i; \boldsymbol{\eta}); \quad (18)$$

$$\frac{\partial \mathcal{L}(\mathbf{w}, \boldsymbol{\xi}, \boldsymbol{\alpha}, \boldsymbol{\beta})}{\partial \xi_i} = 0 \Rightarrow \frac{1}{n} = \sum_{\mathbf{y} \neq \mathbf{y}_i} \alpha_{i\mathbf{y}} + \beta_i; \quad (19)$$

$$\boldsymbol{\alpha} \succeq \mathbf{0}, \text{ and } \boldsymbol{\beta} \succeq \mathbf{0}. \quad (20)$$

Let  $\mathcal{A} = \{\boldsymbol{\alpha} \in \mathbb{R}^l \mid \boldsymbol{\alpha} \succeq \mathbf{0}, \sum_{\mathbf{y} \neq \mathbf{y}_i} \alpha_{i\mathbf{y}} \leq \frac{1}{n}\}$  be the domain of  $\boldsymbol{\alpha}$ . Define

$$\mathbf{u}(\boldsymbol{\alpha}) := \sum_{i=1}^n \sum_{\mathbf{y} \neq \mathbf{y}_i} \alpha_{i\mathbf{y}} \Phi_{\mathbf{y}_i, \mathbf{y}}^{\mathcal{V}}(\mathbf{x}_i) \text{ and } \mathbf{v}(\boldsymbol{\alpha}, \boldsymbol{\eta}) := \sum_{i=1}^n \sum_{\mathbf{y} \neq \mathbf{y}_i} \alpha_{i\mathbf{y}} \Phi_{\mathbf{y}_i, \mathbf{y}}^{\mathcal{C}}(\mathbf{x}_i; \boldsymbol{\eta}). \quad (21)$$

Substituting the above relations into (16), the Lagrangian dual of the inner problem of (3) can be written as

$$\max_{\boldsymbol{\alpha} \in \mathcal{A}} -\frac{1}{2\lambda} \|\mathbf{u}(\boldsymbol{\alpha})\|^2 - \frac{1}{2\lambda} \|\mathbf{v}(\boldsymbol{\alpha}, \boldsymbol{\eta})\|^2 + \mathbf{b}^\top \boldsymbol{\alpha}. \quad (22)$$

□

## C. Proof of Theorem 1

The proof of Theorem 1 can be adapted from the proof of Theorem 2 in [34].

## D. Proof of Proposition 1

*Proof.* Let  $\Omega(\boldsymbol{\omega}) = \frac{1}{2} (\sum_{k=1}^t \|\boldsymbol{\omega}_k\|)^2$ . Define a cone  $\mathcal{Q}_r = \{(\mathbf{u}, v) \in \mathbb{R}^{r+1}, \|\mathbf{u}\|_2 \leq v\}$ . Let  $z_k = \|\boldsymbol{\omega}_k\|$ , we have  $\Omega(\mathbf{v}) = \frac{1}{2} (\sum_{k=1}^t \|\boldsymbol{\omega}_k\|)^2 = \frac{1}{2} z^2$ , where  $z = \sum_{k=1}^t z_k$ ,  $z_k \geq 0$  and  $z \geq 0$ . Then, problem (10) can be transformed to the following problem:

$$\min_{z, \mathbf{u}, \mathbf{v}} \frac{\lambda}{2} \|\mathbf{u}\|^2 + \frac{\lambda}{2} z^2 + \frac{1}{n} \sum_{i=1}^n \xi_i, \text{ s.t. } \sum_{k=1}^t z_k \leq z, \quad (\boldsymbol{\omega}_k, z_k) \in \mathcal{Q}_r, \\ \mathbf{w}^\top \Phi_{\mathbf{y}_i, \mathbf{y}}^{\mathcal{U}^t}(\mathbf{x}_i) \geq \Delta(\mathbf{y}, \mathbf{y}_i) - \xi_i, \quad \xi_i \geq 0 \forall i, \forall \mathbf{y} \in \mathcal{Y} \setminus \mathbf{y}_i.$$

where  $\boldsymbol{\omega} = [\boldsymbol{\omega}'_1, \dots, \boldsymbol{\omega}'_t]'$ . The Lagrangian function of (23) can be written as:

$$\mathcal{L}(z, \mathbf{v}, \boldsymbol{\xi}, b, \boldsymbol{\alpha}, \gamma, \boldsymbol{\zeta}, \boldsymbol{\varpi}) = \frac{\lambda}{2} \|\mathbf{u}\|^2 + \frac{\lambda}{2} z^2 + \frac{1}{n} \sum_{i=1}^n \xi_i + \gamma (\sum_{k=1}^t z_k - z) - \sum_{k=1}^t (\boldsymbol{\zeta}'_k \boldsymbol{\omega}_k + \varpi_k z_k) \\ - \sum_{i=1}^n \sum_{\mathbf{y} \neq \mathbf{y}_i} \alpha_{i\mathbf{y}} \left( \Delta(\mathbf{y}, \mathbf{y}_i) - \xi_i - \left( \Phi_{\mathbf{y}_i, \mathbf{y}}^{\mathcal{V}}(\mathbf{x}_i) + \sum_{k=1}^t \boldsymbol{\omega}_k^\top \Phi_{\mathbf{y}_i, \mathbf{y}}^{\Gamma_k}(\mathbf{x}_i) \right) \right) - \boldsymbol{\beta}^\top \boldsymbol{\xi},$$

where  $\alpha$ ,  $\gamma$ ,  $\zeta_k$  and  $\varpi_k$  are the Lagrangian dual variables to the corresponding constraints. The KKT condition can be expressed as

$$\begin{aligned}
\nabla_z \mathcal{L} = \lambda z - \gamma &= 0 & \Rightarrow z &= \frac{\gamma}{\lambda}; \\
\nabla_{z_k} \mathcal{L} = \gamma - \varpi_k &= 0 & \Rightarrow \varpi_k &= \gamma; \\
\nabla_{\mathbf{u}} \mathcal{L} = \lambda \mathbf{u} + \sum_{i=1}^n \sum_{\mathbf{y} \neq \mathbf{y}_i} \alpha_{i\mathbf{y}} \Phi_{\mathbf{y}_i, \mathbf{y}}^{\mathbf{y}}(\mathbf{x}_i) & & \Rightarrow \mathbf{u} &= -\frac{1}{\lambda} \sum_{i=1}^n \sum_{\mathbf{y} \neq \mathbf{y}_i} \alpha_{i\mathbf{y}} \Phi_{\mathbf{y}_i, \mathbf{y}}^{\mathbf{y}}(\mathbf{x}_i) \\
\nabla_{\omega_k} \mathcal{L} = -\sum_{i=1}^n \sum_{\mathbf{y} \neq \mathbf{y}_i} \alpha_{i\mathbf{y}} \left( \Phi_{\mathbf{y}_i, \mathbf{y}}^{\Gamma_k}(\mathbf{x}_i) \right) - \zeta_k &= 0 & \Rightarrow \zeta_k &= -\sum_{i=1}^n \sum_{\mathbf{y} \neq \mathbf{y}_i} \alpha_{i\mathbf{y}} \left( \Phi_{\mathbf{y}_i, \mathbf{y}}^{\Gamma_k}(\mathbf{x}_i) \right); \\
\nabla_{\xi_i} \mathcal{L} = \frac{1}{n} - \sum_{\mathbf{y} \neq \mathbf{y}_i} \alpha_{i\mathbf{y}} - \beta_i &= 0 & \Rightarrow \frac{1}{n} &= \sum_{\mathbf{y} \neq \mathbf{y}_i} \alpha_{i\mathbf{y}} + \beta_i; \\
\|\zeta_k\| \leq \varpi_k & & \Rightarrow \|\zeta_k\| &\leq \gamma; \\
\beta_i \geq 0 & & \Rightarrow \sum_{\mathbf{y} \neq \mathbf{y}_i} \alpha_{i\mathbf{y}} &\leq \frac{1}{n}.
\end{aligned}$$

By substituting the above equations into the Lagrangian function, we have

$$\mathcal{L}(z, \mathbf{v}, \xi, b, \alpha, \gamma, \zeta, \varpi) = -\frac{1}{2\lambda} \gamma^2 - \frac{1}{2\lambda} \|\omega(\alpha)\|^2 + \sum_{i=1}^n \sum_{\mathbf{y} \neq \mathbf{y}_i} \alpha_{i\mathbf{y}} \Delta(\mathbf{y}, \mathbf{y}_i).$$

Hence the dual problem of the  $\ell_{2,1}^2$ -regularized problem can be written as:

$$\begin{aligned}
\max_{\gamma, \alpha} \quad & -\frac{1}{2\lambda} \gamma^2 - \frac{1}{2\lambda} \|\mathbf{u}(\alpha)\|^2 + \sum_{i=1}^n \sum_{\mathbf{y} \neq \mathbf{y}_i} \alpha_{i\mathbf{y}} \Delta(\mathbf{y}, \mathbf{y}_i) \\
\text{s.t.} \quad & \left\| \sum_{i=1}^n \sum_{\mathbf{y} \neq \mathbf{y}_i} \alpha_{i\mathbf{y}} \Phi_{\mathbf{y}_i, \mathbf{y}}^{\Gamma_k}(\mathbf{x}_i) - \zeta_k \right\| \leq \gamma, \quad k = 1, \dots, t, \\
& \alpha_i \geq 0, \sum_{\mathbf{y} \neq \mathbf{y}_i} \alpha_{i\mathbf{y}} \leq \frac{1}{n}, \quad i = 1, \dots, n.
\end{aligned}$$

Let  $\theta := -\frac{1}{2\lambda} \gamma^2 - \frac{1}{2\lambda} \|\mathbf{u}(\alpha)\|^2 + \sum_{i=1}^n \sum_{\mathbf{y} \neq \mathbf{y}_i} \alpha_{i\mathbf{y}} \Delta(\mathbf{y}, \mathbf{y}_i)$ ,  $\omega_k(\alpha, \eta_k) := \sum_{i=1}^n \sum_{\mathbf{y} \neq \mathbf{y}_i} \alpha_{i\mathbf{y}} \Phi_{\mathbf{y}_i, \mathbf{y}}^{\Gamma_k}(\mathbf{x}_i)$  and  $g(\alpha, \eta_k) = -\frac{1}{2\lambda} \|\omega_k(\alpha, \eta_k)\|^2 - \frac{1}{2\lambda} \|\omega(\alpha)\|^2 + \sum_{i=1}^n \sum_{\mathbf{y} \neq \mathbf{y}_i} \alpha_{i\mathbf{y}} \Delta(\mathbf{y}, \mathbf{y}_i)$ . We have

$$\begin{aligned}
\max_{\theta, \alpha} \quad & \theta, \\
\text{s.t.} \quad & \theta \leq g(\alpha, \eta_k), \quad k = 1, \dots, t, \\
& \alpha_i \geq 0, \quad i = 1, \dots, n.
\end{aligned}$$

which indeed is in the form of problem (8) by letting  $\mathcal{A}$  be the domain of  $\alpha$ . This completes the proof and brings the connection between the primal and dual formulation.  $\square$

## E. Computation of $\Omega^*(\mathbf{z})$

The conjugate of  $\Omega(\mathbf{w})$  is defined as

$$\Omega^*(\mathbf{z}) = \max_{\mathbf{u}, \omega} \mathbf{w}^\top \mathbf{z} - \left( \frac{1}{2} \|\mathbf{u}\|^2 + \frac{\sigma}{2\lambda} \|\omega\|^2 + \frac{1}{2} \left( \sum_{k=1}^t \|\omega_k\| \right)^2 \right).$$

Let  $\mathbf{z} = [\mathbf{z}_u; \mathbf{z}_v]$ , where  $\mathbf{z}_u$  and  $\mathbf{z}_v$  are vectors corresponding to  $\mathbf{u}$  and  $\boldsymbol{\omega}$ , respectively. Let  $\Upsilon(\boldsymbol{\omega}) = (\frac{\sigma}{2\lambda} \|\boldsymbol{\omega} - \frac{\lambda \mathbf{z}_v}{\sigma}\|^2 + \frac{1}{2}(\sum_{k=1}^t \|\boldsymbol{\omega}_k\|)^2)$ .  $\Omega^*(\mathbf{z})$  can be computed by

$$\begin{aligned}\Omega^*(\mathbf{z}) &= \arg \max_{\mathbf{u}, \boldsymbol{\omega}} \mathbf{u}^\top \mathbf{z}_u + \boldsymbol{\omega}^\top \mathbf{z}_v - \left( \frac{1}{2} \|\mathbf{u}\|^2 + \frac{\sigma}{2\lambda} \|\boldsymbol{\omega}\|^2 + \frac{1}{2} \left( \sum_{k=1}^t \|\boldsymbol{\omega}_k\| \right)^2 \right) \\ &= \left[ \arg \min_{\mathbf{u}} \left( \frac{1}{2} \|\mathbf{u}\|^2 - \mathbf{u}^\top \mathbf{z}_u \right); \arg \min_{\boldsymbol{\omega}} \Upsilon(\boldsymbol{\omega}) \right] \\ &= \left[ \mathbf{z}_u; \arg \min_{\boldsymbol{\omega}} \Upsilon(\boldsymbol{\omega}) \right],\end{aligned}$$

In other words, we just need to solve the following problem

$$\min_{\boldsymbol{\omega}} \quad \frac{\sigma}{2\lambda} \|\boldsymbol{\omega} - \frac{\lambda \mathbf{z}_v}{\sigma}\|^2 + \frac{1}{2} \left( \sum_{k=1}^t \|\boldsymbol{\omega}_k\| \right)^2. \quad (23)$$

This is a strictly convex problem, and a unique minimizer can be computed in closed-form [24].

**Proposition 3.** *Let  $\hat{\boldsymbol{\omega}}$  be an optimal solution of problem (23). Then,  $\hat{\boldsymbol{\omega}}$  is unique, and can be cheaply calculated by Algorithm 3.*

---

**Algorithm 3** Computation of  $\Omega^*(\mathbf{z})$ .

---

- Given  $\mathbf{z} = [\mathbf{z}_u; \mathbf{z}_v]$ , parameter  $s = \frac{\lambda}{\sigma}$  and scalar  $T$ . Let  $\boldsymbol{\omega} = \frac{\lambda \mathbf{z}_v}{\sigma}$ .
- 1: Calculate  $\hat{o}_k = \|\boldsymbol{\omega}_k\|$ , where  $\boldsymbol{\omega}_k$  is associated with  $\boldsymbol{\omega}_k$  for all  $k = 1, \dots, T$ .
  - 2: Sort  $\hat{\mathbf{o}}$  to obtain  $\bar{\mathbf{o}}$  such that  $\bar{o}_{(1)} \geq \dots \geq \bar{o}_{(T)}$ .
  - 3: Find  $\rho = \max \left\{ t \mid \bar{o}_k - \frac{s}{1+ks} \sum_{i=1}^k \bar{o}_i > 0, k = 1, \dots, T \right\}$ .
  - 4: Calculate a threshold value  $\varsigma = \frac{s}{1+\rho s} \sum_{i=1}^{\rho} \bar{o}_i$ .
  - 5: Compute  $\mathbf{o}$ , where  $o_k = \begin{cases} \hat{o}_k - \varsigma, & \text{if } \hat{o}_k > \varsigma, \\ 0, & \text{Otherwise.} \end{cases}$
  - 6: Compute  $\hat{\boldsymbol{\omega}}_k = \begin{cases} \frac{o_k}{\|\boldsymbol{\omega}_k\|} \boldsymbol{\omega}_k, & \text{if } o_k > 0, \\ \mathbf{0}, & \text{otherwise,} \end{cases}$
  - 7: Let  $\hat{\boldsymbol{\omega}} = [\boldsymbol{\omega}_k]_{k \in [T]}$ . Output  $\Omega^*(\mathbf{z}) = [\mathbf{z}_u; \hat{\boldsymbol{\omega}}]$ .
- 

*Proof.* Please refer the proof in Appendix F of [24]. □

## F. Proof of Proposition 2

*Proof.* Let  $P(\mathbf{w}) = \frac{\lambda}{2} \|\mathbf{u}\|^2 + \frac{\lambda}{2} (\sum_{k=1}^t \|\boldsymbol{\omega}_k\|)^2 + \frac{1}{n} \sum_{i=1}^n \xi_i$ ,  $Q(\mathbf{w}) = P(\mathbf{w}) + \frac{\sigma}{2} \|\boldsymbol{\omega}\|^2$  and  $\Theta = \frac{1}{n} \sum_{i=1}^n (\max_{\mathbf{y} \neq \mathbf{y}_i} \Delta(\mathbf{y}, \mathbf{y}_i)) = P(\mathbf{0})$ . Suppose  $\bar{\mathbf{w}}$  is a minimizer of  $P(\mathbf{w})$ . Then, we have  $P(\bar{\mathbf{w}}) \leq P(\mathbf{0})$ . Accordingly, we have  $\frac{\lambda}{2} \|\bar{\boldsymbol{\omega}}\|^2 \leq \frac{\lambda}{2} (\sum_{k=1}^t \|\bar{\boldsymbol{\omega}}_k\|)^2 \leq \frac{\lambda}{2} (\sum_{k=1}^t \|\bar{\boldsymbol{\omega}}_k\|)^2 + \frac{\lambda}{2} \|\bar{\mathbf{u}}\|^2 \leq P(\bar{\mathbf{w}}) \leq \Theta$ , which implies that  $\frac{\lambda}{2} \|\bar{\boldsymbol{\omega}}\|^2 \leq \Theta$ . Let  $\mathbf{w}^*$  be an  $\frac{\epsilon}{2}$ -accurate solution of (11). Then, we have  $Q(\mathbf{w}^*) \leq Q(\bar{\mathbf{w}}) + \frac{\epsilon}{2}$ . It follows that

$$P(\mathbf{w}^*) \leq Q(\mathbf{w}^*) \leq Q(\bar{\mathbf{w}}) + \frac{\epsilon}{2} = P(\bar{\mathbf{w}}) + \frac{\sigma}{2} \|\bar{\boldsymbol{\omega}}\|^2 + \frac{\epsilon}{2}.$$

By setting  $\sigma \leq \lambda\epsilon/2\Theta$ , we have  $\frac{\sigma}{2} \|\bar{\boldsymbol{\omega}}\|^2 \leq \frac{\epsilon}{2}$ , and  $\mathbf{w}^*$  is an  $\epsilon$ -accurate solution of (10). □

## G. Proof of Theorem 2

The proof can be adapted from the proof of Corollary 3 in [28].
